# Supplementary material for: Effect of high intensity circuit training on muscle mass, muscular strength, and blood parameters in sedentary workers
Source: PeerJ. 2024 Mar 22;12:e17140. doi: 10.7717/peerj.17140 (PMC10962336; doi:10.7717/peerj.17140)
Supplement: Supplemental Information 1 — The sedentary were used for statistical analysis to compare groups A, B and C. [file peerj-12-17140-s001.xlsx]

## Sheet: Worksheets 1
NO	Groups	Height	Body composition										Muscle strength												Blood parameters
			Pre-test					Post-test					Pre-test		Post-test		Pre-test				Post-test				Pre-test				Post-test
			Body weight	Muscle mass	BMI	BFP	WHR	Body weight	Muscle mass	BMI	BFP	WHR	Handgrip strength	Back muscle strength	Handgrip strength	Back muscle strength	Knee 60o/s		Knee 180o/s		Knee 60o/s		Knee 180o/s		IGF-1	TCHO	LDL	CRP	IGF-1	TCHO	LDL	CRP
																	extension	flexion	extension	flexion	extension	flexion	extension	flexion
1	H	165	58.9	23.5	21.8	26.9	0.84	58.8	23	21.6	28.2	0.84	27.9	47	22	55	145.8	71.5	103	65.3	100.4	63.9	68	66.6	0.133	126	236.017	0.049	0.147	181	68.21	0.252
2	H	157	59.7	21.5	24	31.9	0.84	59.4	20.8	24.1	34.8	0.85	21.5	61.5	19.1	58.5	192.3	107.7	143.1	46.5	203.1	108	126.3	40.6	0.071	150	26.385	0.171	0.133	179	47.478	0.392
3	A	166	61	26	22.2	22.7	0.85	60.3	25.4	21.9	23.4	0.84	27	91.5	28.2	77.5	162.9	90.3	80.8	46.6	175.5	114.6	84.3	40.4	0.956	154	27.254	1.687	10.283	153	55.158	0.448
4	A	159	58.2	19.2	23	37.8	0.86	58.3	18.9	23	38.8	0.85	23.1	66	26.2	61.5	144.5	109.6	91.9	69.8	177.6	115	73.6	46.3	0.024	154	52.818	0.025	0.195	148	103.98	0.168
5	A	159	56.9	23.2	22.5	25.3	0.87	56.6	22.9	22.4	25.8	0.86	18.1	51	27	51	187.2	98.5	34.5	32.2	173.3	94.1	35	30.8	0.087	68	31.921	0.015	0.162	104	48.72	0.052
6	H	164	54.8	21.3	20.4	28.4	0.82	56.2	21.9	20.9	28.1	0.82	21.7	54	18.4	50.5	212.3	126.3	114.1	84.8	188.1	110.4	122.5	100.2	0.057	151	81.921	0.022	0.107	118	46.532	0.637
7	A	155	42.6	19	17.7	16.6	0.77	42.5	18.9	18.2	16.9	0.77	10.4	21	12.4	36.5	194.5	91.3	145.4	51.3	218.8	119.1	119.1	71.1	0.095	150	154.341	0.148	0.179	170	44.157	0.295
8	C	169.6	68.6	24.5	23.8	34.4	0.87	70.4	24.7	24.8	35.6	0.88	24.2	40	20.5	36	108.9	65.2	29.9	24.6	136.3	81.8	59.2	45.1	0.018	261	28.315	0.633	0.206	238	49.918	0.725
9	A	166	70.2	23.6	25.5	38	0.9	69	22.7	25.4	39.3	0.9	18.6	34	25.3	38	135.5	74	60.1	54.4	167.2	99.2	90.8	67.7	0.042	157	19.847	0.087	0.16	196	36.959	0.391
10	C	164	58.9	21.7	21.9	31.8	0.84	59.3	22.3	22	30.5	0.85	32.9	63	27.9	69.5	143	74.6	29.3	29.9	162.6	109.6	60.9	41.1	0.098	154	49.817	0.247	0.089	106	43.692	0.739
11	A	166	67.5	26	24.5	29.3	0.86	68	25.4	24.7	31.1	0.85	30.2	44.5	34	74	120.7	71.7	29.8	32.7	120.6	78.3	79	77.6	0.092	246	43.311	0.009	0.153	238	222.503	0.021
12	H	157	50.7	16.3	20.6	38.4	0.8	51.9	17.4	21	36.3	0.82	19.1	58.5	20	57	157.2	96	96.9	69	71.7	78	77.9	68	0.038	170	28.405	0.052	0.053	210	103.035	0.412
13	A	161.5	62.1	22.9	23.8	31.3	0.83	61.3	23.1	23.4	30.2	0.84	21.6	61	26.4	81	111.4	72.4	62.3	31.9	165.1	128.3	72.3	39	0.102	94	77.533	0.088	0.1	115	69.602	0.094
14	H	164	53.1	20.4	19.8	28	0.81	54.4	20.7	20.2	28.6	0.81	24.8	79.5	26.4	75	183.7	94.7	102.1	59.8	140.8	101.4	87.4	66.3	0.092	121	131.22	0.014	0.136	152	57.152	0.009
15	H	155.5	55.2	19.7	22.8	33.8	0.85	56.4	21.1	22.9	30.4	0.83	29.1	69	26.2	67	219.2	119.4	123.9	53.2	235.2	64.8	134.1	53.3	0.05	136	26.571	0.099	0.169	147	66.714	0.151
16	C	162	48.6	19.6	18.5	26	0.8	48.7	19	18.6	27.9	0.79	20.7	54	21.6	60	153.2	114.3	33.3	69.5	181	86	44.3	52.1	2.928	161	32.936	0.119	5.2	193	41.054	0.064
17	C	147	51.9	18.5	24	33.7	0.84	51.4	18.6	23.8	32.5	0.84	18.4	21.5	16.9	24.5	145.9	81.6	96.2	62.4	161.8	95.2	101.7	75.1	0.143	115	30.757	0.267	0.12	134	76.831	0.587
18	C	151	64.1	20.7	28.1	39.6	0.91	62.8	20.6	27.2	38.4	0.89	24.5	67.5	26.2	59.5	160.8	95.9	105	60.6	159.1	99.9	60.1	51.6	0.06	258	41.76	0.891	0.15	200	186.702	2.083
19	H	161	57.6	21.3	22.2	31.2	0.83	58.2	22	22.5	30.4	0.84	26.5	77	25.8	75	217.2	139.6	118.2	59.1	183.6	123.6	128	99.7	0.047	133	41.293	0.127034	0.198	164	84.369	0.726
20	A	162	70.3	24.6	26.8	35.9	0.9	69.6	24.6	26.5	35.3	0.89	26.5	38.5	26.6	44.5	114.5	62.3	57.9	61	106.2	64.3	59.6	35.1	0.089	129	112.082	0.53	0.109	140	81.995	0.647
21	C	154.5	55.4	17.8	23.2	39.2	0.87	55.8	18.6	22.9	37.3	0.87	16	39	17.1	40.5	69.3	45.6	37.2	37.7	71.4	63.3	31.8	39.6	0.06	131	24.641	0.268	0.265	197	86.664	0.745
22	C	161.2	66.2	22.9	25.5	36.4	0.91	65.3	22.1	25.2	37.7	0.9	19.6	40	22.8	54	128.8	60.2	25.7	29.6	165.9	102.5	73.1	53.4	0.234	137	54.109	0.139	3.687	215	101.866	0.151
23	C	151	48.5	18	21.3	29.7	0.81	48.7	17.7	21.4	31.1	0.83	21.1	49.5	14.2	32.5	118	90.3	35.8	45.2	107.6	86	53.7	45	1.392	137	9.308	0.086	2.932	155	53.192	0.068
24	H	165.5	85.2	26.7	31.1	42.3	0.91	84.9	27.9	30.5	40.1	0.92	29.1	52	34.8	64	149.3	78.9	42.2	45	167.8	87.6	70.3	57.3	0.187	134	55.003	1.816	0.21	188	79.018	1.792
25	C	154	46.4	15.5	19.6	35.6	0.81	46.3	15.7	19.3	34.1	0.8	21.3	49.5	16.8	53.5	165.5	90.2	93	50.5	147.5	80.1	79.4	61.5	0.454	203	25.195	0.084	2.109	222	117.686	0.12
26	H	150	64.5	19.7	28.6	43.5	0.93	65.5	20.2	29.1	43.2	0.94	25.8	64	21.7	55	155	75.1	69.6	51.1	149.1	76.9	81.4	52.3	0.037	121	18.245	1.063	0.087	178	100.579	1.257
27	C	152	57.9	19.3	25.1	37.8	0.88	60	20.1	26	37.5	0.91	17.8	54.5	18.4	60.5	147.7	113.5	84.2	50.7	138.5	97.6	84.3	64.4	0.095	176	47.648	0.23	0.162	154	97.911	0.212
28	H	159	48.2	20.1	19	22.1	0.76	46.9	20.4	18.5	19.6	0.77	23.2	41.5	22.9	58.5	180.3	81	68.9	38.5	199.9	116	71.8	70.1	0.716	226	56.58	0.023	2.108	221	223.798	0.011
29	A	154.1	59	20.8	25.8	34.4	0.83	57.8	20.9	24.2	32.7	0.82	27.3	68.5	20.8	64	166.5	108.2	59.8	61.2	169.2	122.6	78.4	82.1	0.15	167	39.294	0.068	0.109	160	179.302	0.043
30	A	159	52.9	17.2	20.9	38.2	0.81	53.4	18	21.1	36.2	0.82	14.6	50	17.7	40.5	141.8	54.9	63.9	31.4	178.3	95.4	113.6	50.5	0.219	137	20.022	0.089	0.188	164	86.97	0.073
31	C	162	56.2	23.7	21.4	22.5	0.82	55.4	24	20.6	21.1	0.81	29.1	41	24.5	52	145.3	88.3	69.5	55.1	109.1	103.8	60.6	65.8	0.101	178	52.179	1.527	0.17	155	69.722	0.236
32	C	160	74.5	24.4	29.1	39.8	0.89	75.7	24.2	29.6	41.4	0.91	27.2	78.5	27.9	70	173.7	100	59.2	32.8	179.3	101.1	106.5	73.3	0.122	145	45.33	0.179	0.253	148	77.37	0.072
33	A	164	62.1	21.6	23.1	35.3	0.85	60.8	20.7	22.6	36.7	0.86	20.8	48.5	17.2	36	158.3	84.2	69	37.1	166.1	79.3	93.3	56.3	0.099	101	32.78	0.17	0.128	139	26.967	0.31
34	H	166	58.7	22.1	21.3	30.1	0.81	58.4	22.9	20.9	27.9	0.82	25.1	70.5	22.6	83.5	198	140.8	113.3	79	207.6	150.6	139.3	119.2	0.115	124	31.155	0.036	0.136	146	31.886	0.049
35	H	162	51.9	21.7	19.8	22.4	0.79	51.8	22	19.7	21	0.79	27	72	25.3	65	192.5	139.6	107.8	90.7	223.8	139.1	97.2	72.1	0.046	109	13.174	0.062	0.182	180	29.795	0.013
36	A	155	49.6	17.6	20.6	32.6	0.82	49.7	17.1	20.7	34.8	0.84	15.4	27	13.9	46.5	103.7	72.6	80.1	54.3	152.6	75.1	78.9	45.5	0.097	165	28.326	0.092	0.127	207	50.238	0.055
